# Supplementary material for: Synthesis through 3D printing: formation of 3D coordination polymers
Source: Royal Society of Chemistry journal article supplement (doi:10.1039/d0ra01887b), 2020-01-01
Supplement: d0ra01887b1.pdf [file d0ra01887b1.pdf]

# Synthesis Through 3D printing: Formation of 3D Coordination Polymers

Oded Halevi<sup>a,b,c</sup>, Jingwei Chen<sup>b,c</sup>, Gurunathan Thangavel<sup>b</sup>, Samuel Alexander Morris<sup>b</sup>, Tal Ben Uliel<sup>d</sup>, Yaakov Raphael Tischler<sup>d</sup>, Pooi See Lee<sup>b,c\*</sup>, Shlomo Magdassi<sup>a,c\*</sup>

Table S1 - Crystallographic data

Figure S1- Printing process scheme

Figure S2 – N<sub>2</sub> adsorption-desorption isotherm

Figure S3 - EDX

Figure S4 - XPS of nickel

Figure S5 - XPS of oxygen

Table S2 - Printing Parameters

- 
- [a] Casali Center for Applied Chemistry, Institute of Chemistry, The Hebrew University of Jerusalem, Jerusalem, 91904, Israel.  
E-mail: [magdassi@mail.huji.ac.il](mailto:magdassi@mail.huji.ac.il)
- [b] School of Materials Science and Engineering, Nanyang Technological University, 639798, Singapore.  
E-mail: [pslee@ntu.edu.sg](mailto:pslee@ntu.edu.sg)
- [c] Singapore-HUJ Alliance for Research and Enterprise (SHARE), Nanomaterials for Energy and Energy-Water Nexus (NEW), Campus for Research Excellence and Technological Enterprise (CREATE), Singapore 138602.
- [d] Department of Chemistry, Bar-Ilan University, Ramat-Gan, 5290002, Israel.

**Table S1. Crystallographic data and data collection parameters for [Ni(AAm)<sub>4</sub>(H<sub>2</sub>O)<sub>2</sub>](NO<sub>3</sub>)<sub>2</sub>**

---

|                                                     |                                                                   |
|-----------------------------------------------------|-------------------------------------------------------------------|
| Formula                                             | C <sub>12</sub> H <sub>24</sub> N <sub>6</sub> Ni O <sub>12</sub> |
| M                                                   | 503.04                                                            |
| T (K)                                               | 296(2)                                                            |
| λ (Å)                                               | 0.71073                                                           |
| Crystal system                                      | Triclinic                                                         |
| Space group                                         | <i>P</i> $\bar{1}$ (2)                                            |
| <i>a</i> (Å)                                        | 7.3043(5)                                                         |
| <i>b</i> (Å)                                        | 8.8329(6)                                                         |
| <i>c</i> (Å)                                        | 9.7206(7)                                                         |
| α (°)                                               | 65.294(3)                                                         |
| β (°)                                               | 70.106(3)                                                         |
| γ (°)                                               | 79.466(3)                                                         |
| <i>V</i> (Å <sup>3</sup> )                          | 535.14(7)                                                         |
| <i>Z</i>                                            | 1                                                                 |
| ρ <sub>calcd.</sub> (Mg/m <sup>3</sup> )            | 1.561                                                             |
| μ (mm <sup>-1</sup> )                               | 0.977                                                             |
| Range of 2θ (°)                                     | 2.41-34.368                                                       |
| Total reflection                                    | 43507                                                             |
| Independent reflection ( <i>R</i> <sub>int</sub> )  | 4466 [R(int) = 0.0246]                                            |
| Data / restraints/ parameters                       | 4466 / 30 / 191                                                   |
| Final <i>R</i> Indices (all data)                   | R1 = 0.0353, wR2 = 0.0881                                         |
| Final <i>R</i> Indices ( <i>I</i> > 2σ( <i>I</i> )) | R1 = 0.0300, wR2 = 0.0819                                         |

---

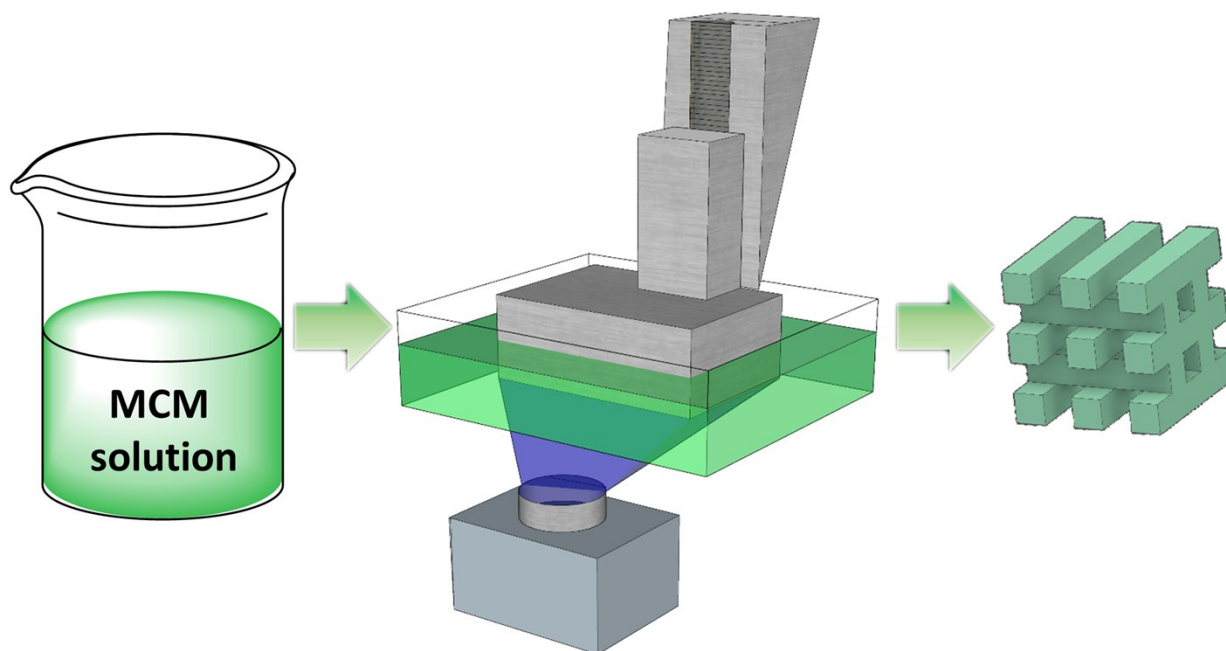

**Figure S1. A scheme of the 3D-Printing of PolyNiComplex by DLP.**

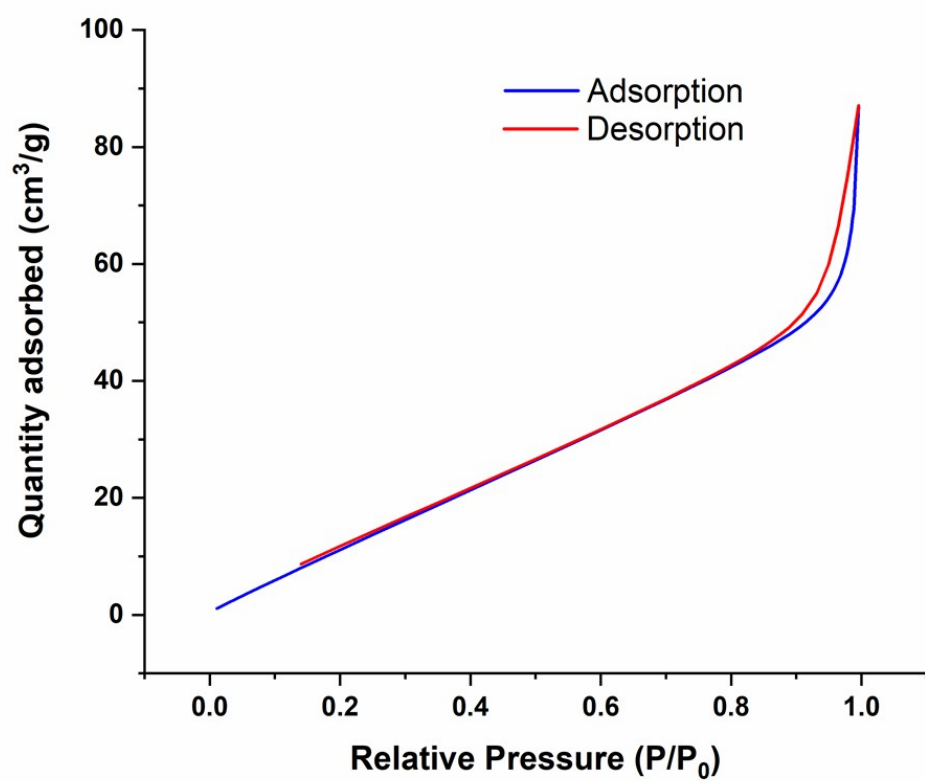

Figure S2. Nitrogen adsorption-desorption isotherm of the grinded polyNiComplex.

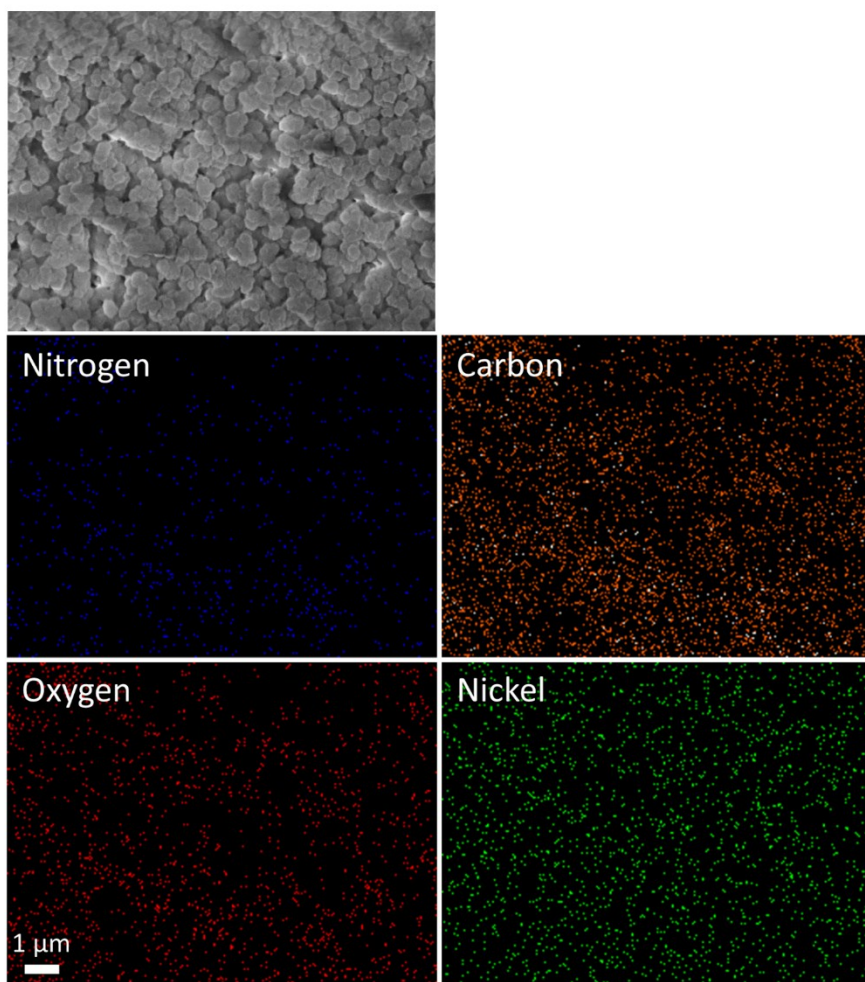

**Figure S3. EDX measurement of the printed PolyNiComplex.**

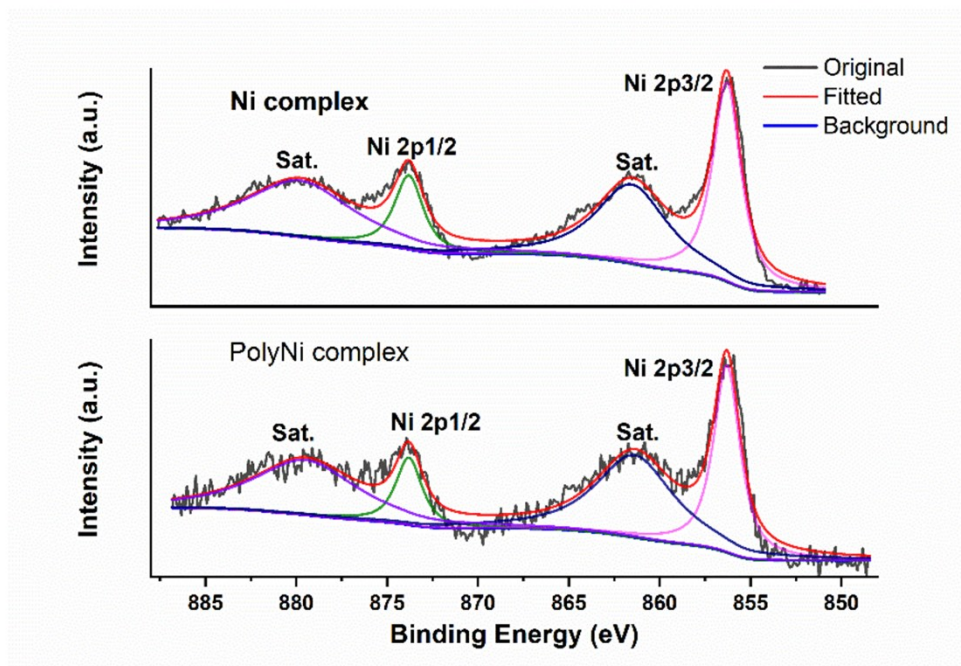

Figure S4. XPS of Ni complex and polyNiComplex.

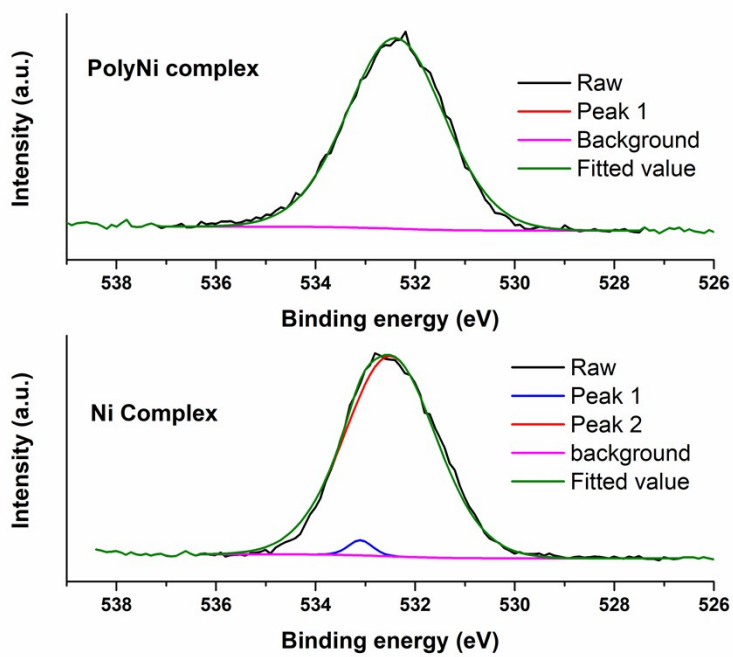

**Figure S5. O 1s spectra before and after polymerization.**

In the upper graph, peak 1 curve is overlapped by the fitted value curve.

**Table S2. Printing parameters for 3D printing of polyNiComplex.**

| <b>Parameter</b>                     | <b>Value</b>                 |
|--------------------------------------|------------------------------|
| Light Intensity                      | 39.880 [mW/cm <sup>2</sup> ] |
| Slice thickness                      | 0.025 [mm]                   |
| Burn-In Exposure Time                | 5.000 [s]                    |
| Exposure Time                        | 1.200 [s]                    |
| Separation Velocity                  | 0.200 [mm/s]                 |
| Separation Distance                  | 1.000 [mm]                   |
| Approach Velocity                    | 0.500 [mm/s]                 |
| Slides Per Layer                     | 1.000                        |
| Slide Velocity                       | 10.000 [mm/s]                |
| Burn-In Wait Time (After Exposure)   | 1.000 [s]                    |
| Burn-In Wait Time (After Separation) | 1.000 [s]                    |
| Burn-In Wait Time (After Approach)   | 0.000 [s]                    |
| Burn-In Wait Time (After Slide)      | 0.000 [s]                    |
| Normal Wait Time (After Exposure)    | 1.000 [s]                    |
| Normal Wait Time (After Separation)  | 1.000 [s]                    |
| Normal Wait Time (After Approach)    | 0.000 [s]                    |
| Normal Wait Time (After Slide)       | 0.000 [s]                    |
